# Supplementary material for: The Contribution of RNA Decay Quantitative Trait Loci to Inter-Individual Variation in Steady-State Gene Expression Levels
Source: PLoS Genet. 2012 Oct 11;8(10):e1003000. doi: 10.1371/journal.pgen.1003000 (PMC3469421; doi:10.1371/journal.pgen.1003000)
Supplement: Table S3 — Gene Ontology categories for genes decaying faster than average (FDR<0.1%). (XLSX) [file pgen.1003000.s015.xlsx]

## Sheet: Top 10% of Decay & Expression
Gene Ontology Categories for genes decaying faster than average
GO Subcategory	Expected	Observed	FDR	Enrichment
nucleus	199.989	367	6.59905e-41	up
membrane-bounded organelle	325.085	459	3.58986e-25	up
intracellular membrane-bounded organelle	324.744	459	3.58986e-25	up
cellular macromolecule metabolic process	220.48	351	1.25496e-24	up
nucleic acid metabolic process	143.978	256	4.98319e-22	up
gene expression	145.051	255	3.09592e-21	up
regulation of gene expression	114.656	216	7.86966e-21	up
transcription	105.971	204	1.43319e-20	up
regulation of macromolecule biosynthetic process	112.167	210	7.65303e-20	up
regulation of transcription	102.312	197	8.78779e-20	up
intracellular organelle	358.75	474	1.49347e-19	up
organelle	359.287	474	2.04924e-19	up
nucleic acid binding	121.974	220	3.92457e-19	up
cellular macromolecule biosynthetic process	134.903	236	3.92457e-19	up
macromolecule biosynthetic process	137.684	239	4.86211e-19	up
nuclear lumen	60.06	136	8.36139e-19	up
macromolecule metabolic process	241.216	354	1.63464e-18	up
nuclear part	76.063	158	1.63464e-18	up
regulation of cellular biosynthetic process	117.681	212	2.67209e-18	up
regulation of biosynthetic process	118.461	212	5.74261e-18	up
intracellular part	420.518	523	1.13866e-17	up
regulation of macromolecule metabolic process	132.561	228	1.60032e-17	up
intracellular	432.91	533	1.68118e-17	up
nucleobase, nucleoside, nucleotide and nucleic acid metabolic process	165.641	266	3.66385e-17	up
membrane part	225.408	126	5.36248e-17	down
regulation of nucleobase, nucleoside, nucleotide and nucleic acid metabolic process	117.144	207	6.93027e-17	up
regulation of metabolic process	153.004	249	1.75001e-16	up
regulation of nitrogen compound metabolic process	118.12	207	1.75001e-16	up
regulation of cellular metabolic process	145.686	240	2.23421e-16	up
DNA binding	88.7971	168	6.09532e-16	up
membrane	271.124	170	7.05363e-16	down
intrinsic to membrane	195.061	104	7.89364e-16	down
regulation of primary metabolic process	138.367	226	1.00449e-14	up
integral to membrane	191.255	104	1.02704e-14	down
intracellular organelle lumen	73.0868	142	4.10678e-14	up
extracellular region	67.6712	16	5.16408e-14	down
nucleolus	28.5419	76	7.39008e-14	up
membrane-enclosed lumen	75.9166	145	7.39008e-14	up
cellular nitrogen compound metabolic process	176.862	267	9.66929e-14	up
organelle lumen	74.4529	142	1.68567e-13	up
nitrogen compound metabolic process	181.449	270	3.76639e-13	up
transcription regulator activity	59.9136	121	4.52278e-13	up
regulation of cellular process	243.655	337	4.52278e-13	up
regulation of biological process	255.56	346	3.55273e-12	up
RNA metabolic process	100.36	170	8.65455e-12	up
cellular metabolic process	285.956	375	1.20047e-11	up
cellular biosynthetic process	165.543	246	1.57358e-11	up
biosynthetic process	169.885	248	8.91986e-11	up
biological regulation	269.855	352	4.66525e-10	up
transcription, DNA-dependent	75.2824	132	7.4592e-10	up
RNA biosynthetic process	75.4287	132	8.37101e-10	up
nucleoplasm	38.0071	81	1.08431e-09	up
system process	58.1084	18	1.82149e-09	down
plasma membrane	139.782	78	1.82551e-09	down
primary metabolic process	292.494	371	3.453e-09	up
regulation of transcription, DNA-dependent	69.9155	121	1.23782e-08	up
regulation of RNA metabolic process	72.0134	123	1.93621e-08	up
zinc ion binding	76.063	128	2.06332e-08	up
apoptosis	45.6671	87	5.21326e-08	up
plasma membrane part	78.4537	35	5.21326e-08	down
programmed cell death	45.9598	87	6.99127e-08	up
cell death	50.4972	93	7.4807e-08	up
death	50.5948	93	8.11343e-08	up
transcription from RNA polymerase II promoter	37.6168	75	9.85809e-08	up
transcription activator activity	17.613	45	1.03033e-07	up
neurological system process	44.9352	14	2.84684e-07	down
histone acetyltransferase complex	1.95158	13	4.49646e-07	up
transcription factor binding	21.7114	50	4.50434e-07	up
chromatin modification	13.6611	37	4.76888e-07	up
metabolic process	320.499	388	5.36521e-07	up
cell cycle	40.8369	77	6.03138e-07	up
transition metal ion binding	86.4552	134	1.09453e-06	up
nucleoplasm part	24.4436	53	1.16614e-06	up
negative regulation of gene expression	23.419	51	1.73431e-06	up
binding	469.893	526	1.90829e-06	up
transcription cofactor activity	14.9784	37	4.53e-06	up
transcription factor activity	37.8119	70	4.79215e-06	up
negative regulation of transcription	21.0283	46	6.13455e-06	up
regulation of transcription from RNA polymerase II promoter	31.1278	60	9.00823e-06	up
intracellular organelle part	193.451	250	9.20741e-06	up
cellular process	446.23	501	1.0006e-05	up
negative regulation of nucleobase, nucleoside, nucleotide and nucleic acid metabolic process	23.2238	48	1.69637e-05	up
substrate-specific transporter activity	35.9091	12	1.78736e-05	down
organelle part	196.085	251	1.83067e-05	up
negative regulation of biological process	81.8202	123	1.83067e-05	up
negative regulation of macromolecule biosynthetic process	24.7363	50	1.8496e-05	up
histone acetylation	2.29311	12	2.06118e-05	up
negative regulation of nitrogen compound metabolic process	23.4678	48	2.11206e-05	up
positive regulation of macromolecule metabolic process	39.5684	70	2.16492e-05	up
regulation of binding	8.73334	25	2.19888e-05	up
negative regulation of cellular biosynthetic process	25.6633	51	2.26888e-05	up
negative regulation of biosynthetic process	26.0536	51	3.44636e-05	up
transporter activity	43.8131	18	3.47346e-05	down
chromatin organization	16.4421	37	3.47346e-05	up
negative regulation of transcription, DNA-dependent	17.1251	38	3.54993e-05	up
protein amino acid acetylation	2.43948	12	3.77947e-05	up
transcription repressor activity	13.9538	33	3.95235e-05	up
negative regulation of RNA metabolic process	17.3203	38	4.51623e-05	up
negative regulation of cellular process	75.3311	113	5.02027e-05	up
positive regulation of biological process	90.6511	130	8.36694e-05	up
ribonucleoprotein complex biogenesis	7.17207	21	8.87907e-05	up
intrinsic to plasma membrane	46.3989	21	9.42128e-05	down
positive regulation of macromolecule biosynthetic process	28.5907	53	9.57391e-05	up
positive regulation of cellular process	82.4056	120	9.57391e-05	up
transcription corepressor activity	6.14749	19	0.000102733	up
ribosome biogenesis	4.58622	16	0.000105266	up
positive regulation of cellular biosynthetic process	30.2496	55	0.000108869	up
positive regulation of transcription	24.3948	47	0.000108869	up
positive regulation of metabolic process	42.5445	71	0.000112996	up
cognition	31.3229	11	0.000120913	down
small molecule metabolic process	65.7196	36	0.000127249	down
positive regulation of cellular metabolic process	40.4466	68	0.000131193	up
cell fraction	41.3736	18	0.000137143	down
integral to plasma membrane	45.4719	21	0.000145271	down
positive regulation of biosynthetic process	30.6887	55	0.000149467	up
I-kappaB kinase/NF-kappaB cascade	7.56239	21	0.000170282	up
cellular protein metabolic process	95.774	134	0.000170282	up
negative regulation of metabolic process	35.47	61	0.000176738	up
chromosome organization	20.7844	41	0.000201272	up
cell adhesion	31.8596	12	0.000212625	down
biological adhesion	31.8596	12	0.000212625	down
protein amino acid acylation	2.92738	12	0.000212625	up
receptor activity	59.133	32	0.000240163	down
post-translational protein modification	61.6213	93	0.000240599	up
positive regulation of nucleobase, nucleoside, nucleotide and nucleic acid metabolic process	27.5661	50	0.000242935	up
positive regulation of nitrogen compound metabolic process	28.3468	51	0.000249154	up
negative regulation of macromolecule metabolic process	32.9818	57	0.000263386	up
regulation of cell death	36.8361	62	0.000263386	up
alpha-beta T cell activation	2.14674	10	0.000288851	up
macromolecule modification	75.4775	109	0.000289334	up
histone modification	6.73296	19	0.000292616	up
regulation of DNA binding	6.78175	19	0.000319512	up
positive regulation of gene expression	25.7121	47	0.000319811	up
negative regulation of cellular metabolic process	32.4939	56	0.000319811	up
organelle organization	58.9378	89	0.000324117	up
lymphocyte activation	11.7583	27	0.000338389	up
covalent chromatin modification	6.83054	19	0.000341803	up
mitotic cell cycle	19.2719	38	0.000342142	up
protein binding	317.815	366	0.000434272	up
cell-cell signaling	29.0298	11	0.000451167	down
regulation of apoptosis	36.2507	60	0.000505639	up
regulation of transcription factor activity	5.90354	17	0.000513623	up
regulation of transcription regulator activity	5.95233	17	0.000566841	up
regulation of programmed cell death	36.4946	60	0.000599019	up
N-acetyltransferase activity	2.8298	11	0.000617476	up
G-protein coupled receptor activity	26.9319	10	0.000652195	down
protein modification process	72.111	103	0.000652195	up
non-membrane-bounded organelle	101.092	136	0.000724974	up
intracellular non-membrane-bounded organelle	101.092	136	0.000724974	up
cell cycle phase	20.1501	38	0.000787886	up
positive regulation of transcription, DNA-dependent	20.9307	39	0.000825433	up
organelle fission	11.1728	25	0.000842465	up
regulation of cell cycle	18.784	36	0.000842465	up
regulation of cytokine production	8.00149	20	0.000869656	up
insoluble fraction	32.2011	14	0.000895423	down
