# Supplementary material for: The Contribution of RNA Decay Quantitative Trait Loci to Inter-Individual Variation in Steady-State Gene Expression Levels
Source: PLoS Genet. 2012 Oct 11;8(10):e1003000. doi: 10.1371/journal.pgen.1003000 (PMC3469421; doi:10.1371/journal.pgen.1003000)
Supplement: Table S6 — Gene Ontology categories for genes with a discordant relationship between decay and gene expression across individuals (FDR<0.1%). (XLSX) [file pgen.1003000.s018.xlsx]

## Sheet: Top 10% of Decay & Expression
Gene Ontology Categories for genes with a discordant relationship between decay and gene expression across individuals
GO Subcategory	Expected	Observed	FDR	Enrichment
nucleus	264.916	377	9.07282e-14	up
macromolecule biosynthetic process	182.384	271	1.31708e-10	up
cellular macromolecule biosynthetic process	178.7	266	1.36135e-10	up
DNA binding	117.626	187	2.69563e-09	up
regulation of biosynthetic process	156.92	234	2.69563e-09	up
regulation of cellular biosynthetic process	155.886	233	2.69563e-09	up
cellular biosynthetic process	219.288	305	2.69563e-09	up
nucleic acid metabolic process	190.721	273	2.69563e-09	up
transcription	140.375	214	2.93157e-09	up
regulation of cellular metabolic process	192.983	274	4.12423e-09	up
cellular macromolecule metabolic process	292.06	382	4.22789e-09	up
intracellular part	557.041	644	4.29992e-09	up
regulation of cellular process	322.759	414	4.29992e-09	up
biosynthetic process	225.04	309	4.38427e-09	up
regulation of transcription	135.528	206	6.45857e-09	up
nucleic acid binding	161.574	236	7.95953e-09	up
regulation of metabolic process	202.678	282	1.07336e-08	up
regulation of macromolecule biosynthetic process	148.583	220	1.15903e-08	up
membrane-bounded organelle	430.626	520	1.34473e-08	up
intracellular	573.457	656	1.34482e-08	up
intracellular membrane-bounded organelle	430.173	519	1.56407e-08	up
gene expression	192.143	268	2.48776e-08	up
transcription regulator activity	79.3649	134	2.78697e-08	up
regulation of nitrogen compound metabolic process	156.468	227	2.78697e-08	up
regulation of biological process	338.529	424	3.83386e-08	up
nucleobase, nucleoside, nucleotide and nucleic acid metabolic process	219.417	297	3.99688e-08	up
RNA metabolic process	132.943	198	5.47026e-08	up
regulation of primary metabolic process	183.289	256	5.47026e-08	up
transcription, DNA-dependent	99.7232	158	5.64296e-08	up
RNA biosynthetic process	99.9171	158	6.28606e-08	up
macromolecule metabolic process	319.528	402	8.41086e-08	up
organelle	475.931	559	8.57079e-08	up
regulation of macromolecule metabolic process	175.598	246	8.64918e-08	up
regulation of transcription, DNA-dependent	92.6139	148	1.02176e-07	up
regulation of nucleobase, nucleoside, nucleotide and nucleic acid metabolic process	155.175	222	1.15906e-07	up
regulation of RNA metabolic process	95.393	151	1.24159e-07	up
intracellular organelle	475.22	557	1.30771e-07	up
cellular metabolic process	378.793	461	1.50299e-07	up
regulation of gene expression	151.879	217	1.86262e-07	up
cellular nitrogen compound metabolic process	234.282	309	1.86262e-07	up
nitrogen compound metabolic process	240.357	315	2.30941e-07	up
biological regulation	357.465	435	7.83302e-07	up
transcription factor activity	50.0878	87	7.19706e-06	up
sensory perception	36.1925	11	1.08592e-05	down
primary metabolic process	387.453	457	1.75962e-05	up
binding	622.446	683	2.1441e-05	up
fever	0.710923	7	3.55121e-05	up
metabolic process	424.551	492	3.55121e-05	up
cellular process	591.101	652	4.54595e-05	up
transporter activity	58.0372	28	8.21615e-05	down
transcription activator activity	23.3312	47	8.83435e-05	up
regulation of fever	0.581665	6	0.000133696	up
positive regulation of fever	0.581665	6	0.000133696	up
heat generation	0.840182	7	0.000144327	up
negative regulation of transcription, DNA-dependent	22.6849	45	0.000198715	up
temperature homeostasis	1.55111	9	0.000253837	up
negative regulation of RNA metabolic process	22.9434	45	0.000257506	up
regulation of heat generation	0.646294	6	0.000283783	up
positive regulation of heat generation	0.646294	6	0.000283783	up
neurological system process	59.5237	31	0.000297059	down
nuclear lumen	79.5588	116	0.000373432	up
positive regulation of biosynthetic process	40.6519	68	0.000396714	up
positive regulation of cellular biosynthetic process	40.0702	67	0.000456495	up
vasculature development	18.0316	37	0.000515591	up
ERK1 and ERK2 cascade	2.52055	11	0.00051878	up
positive regulation of biological process	120.081	162	0.000524858	up
negative regulation of metabolic process	46.9856	75	0.000685084	up
negative regulation of cellular metabolic process	43.0432	70	0.00068636	up
intrinsic to membrane	258.388	207	0.000691287	down
cognition	41.4921	19	0.000717669	down
positive regulation of macromolecule biosynthetic process	37.8728	63	0.000837678	up
transmembrane transporter activity	45.3052	22	0.000848152	down
signaling pathway	134.946	177	0.000929122	up
positive regulation of inflammatory response	2.26203	10	0.000945658	up
immune system process	54.935	84	0.000961075	up
organ development	102.373	140	0.000961075	up
nuclear part	100.757	138	0.000997863	up
